# Supplementary material for: Antibody-Mediated Delivery of VEGF-C Promotes Long-Lasting Lymphatic Expansion That Reduces Recurrent Inflammation
Source: MDPI journal article supplement (doi:10.3390/cells12010172), 2022-12-31
Supplement: s1 [file s1]

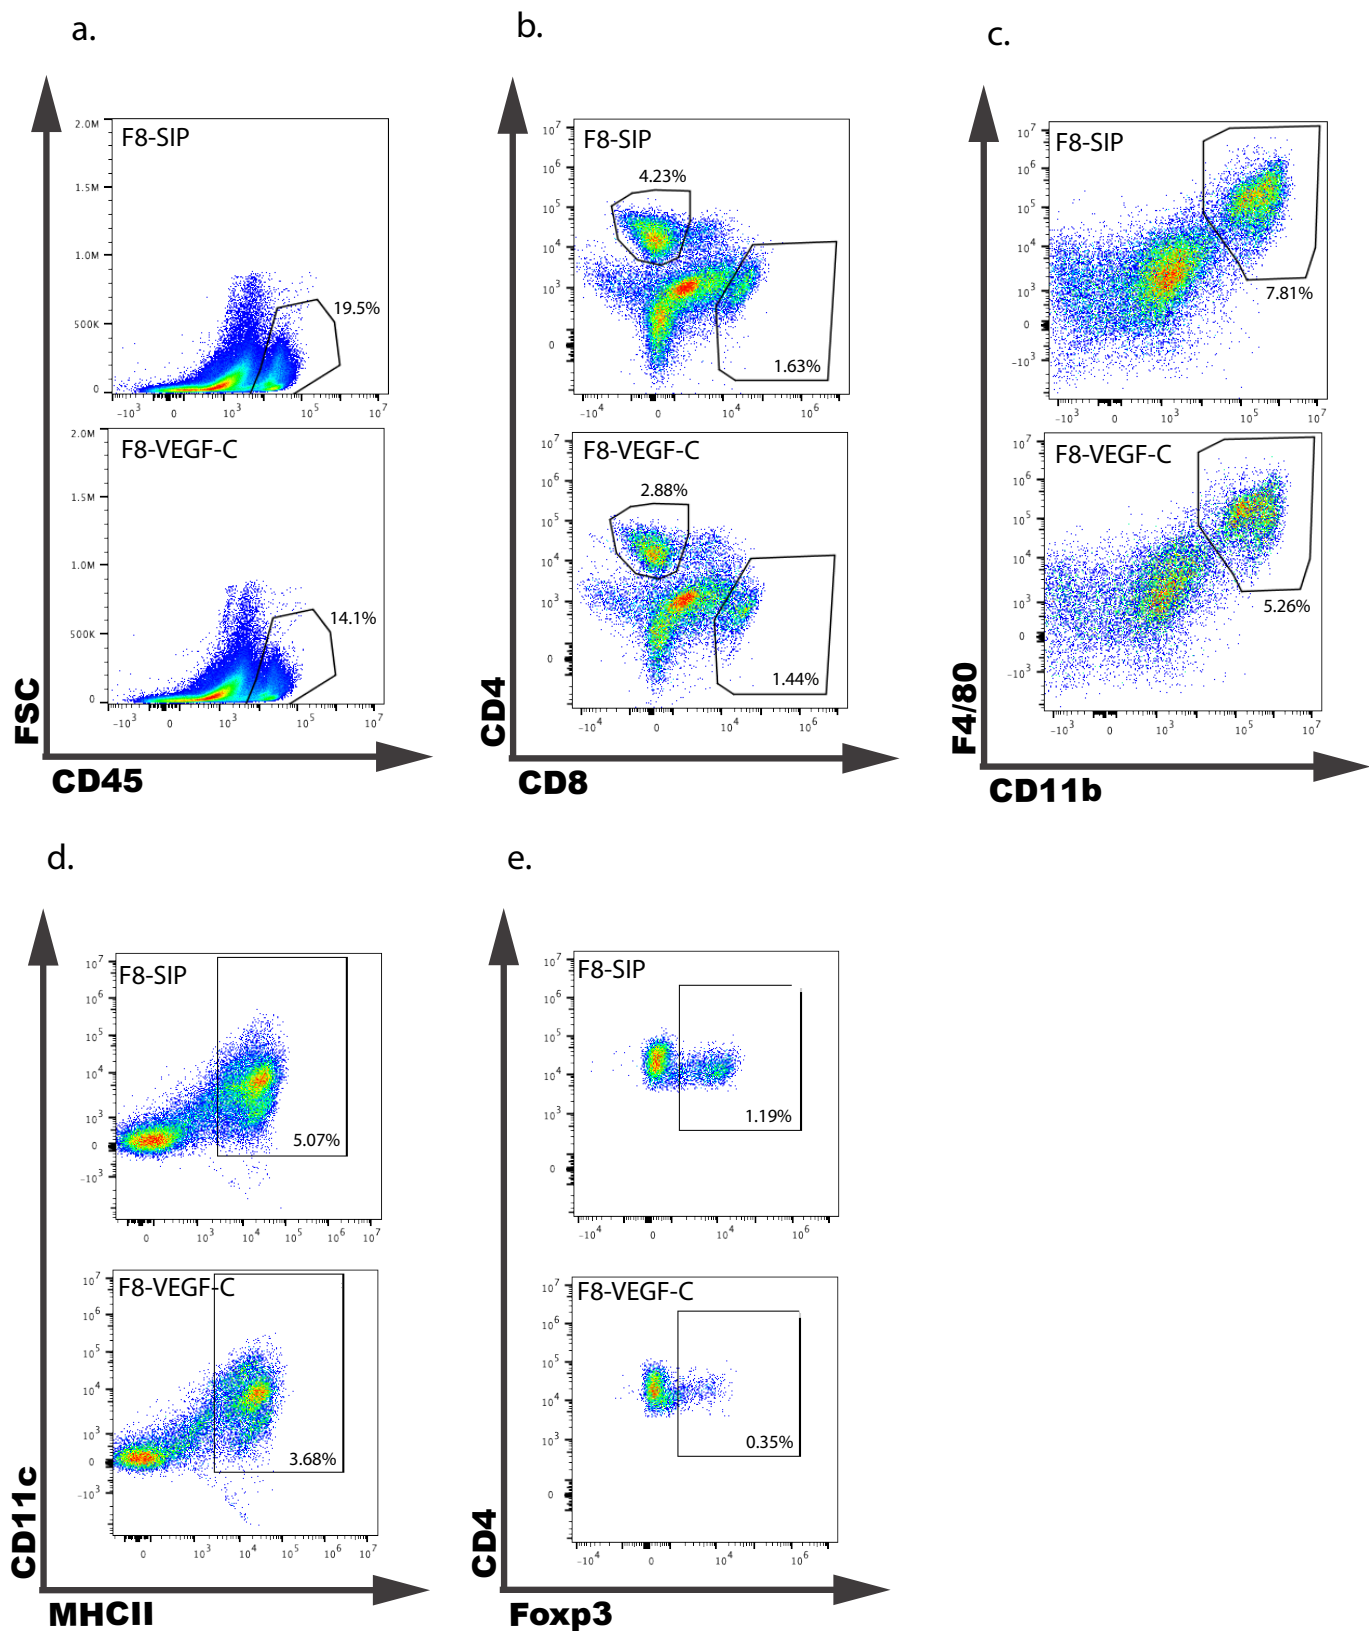

Supplementary Figure S3. Representative FACS plots with gating strategy. Data is presented as % of all living single cells of ears in either F8-SIP or F8-VEGF-C treated mice. Gating strategy for (a) CD45<sup>+</sup> and (b) CD4<sup>+</sup> resp. CD8<sup>+</sup> T cells. Representation of (c) F4/80<sup>+</sup>/CD11b<sup>+</sup> macrophages, (d) CD11c<sup>+</sup>/MHCII<sup>+</sup> dendritic cells and (e) Foxp3<sup>+</sup>/CD4<sup>+</sup> regulatory T cells.
