# Supplementary material for: Antibody-Mediated Delivery of VEGF-C Promotes Long-Lasting Lymphatic Expansion That Reduces Recurrent Inflammation
Source: MDPI journal article supplement (doi:10.3390/cells12010172), 2022-12-31
Supplement: s1 [file s1]

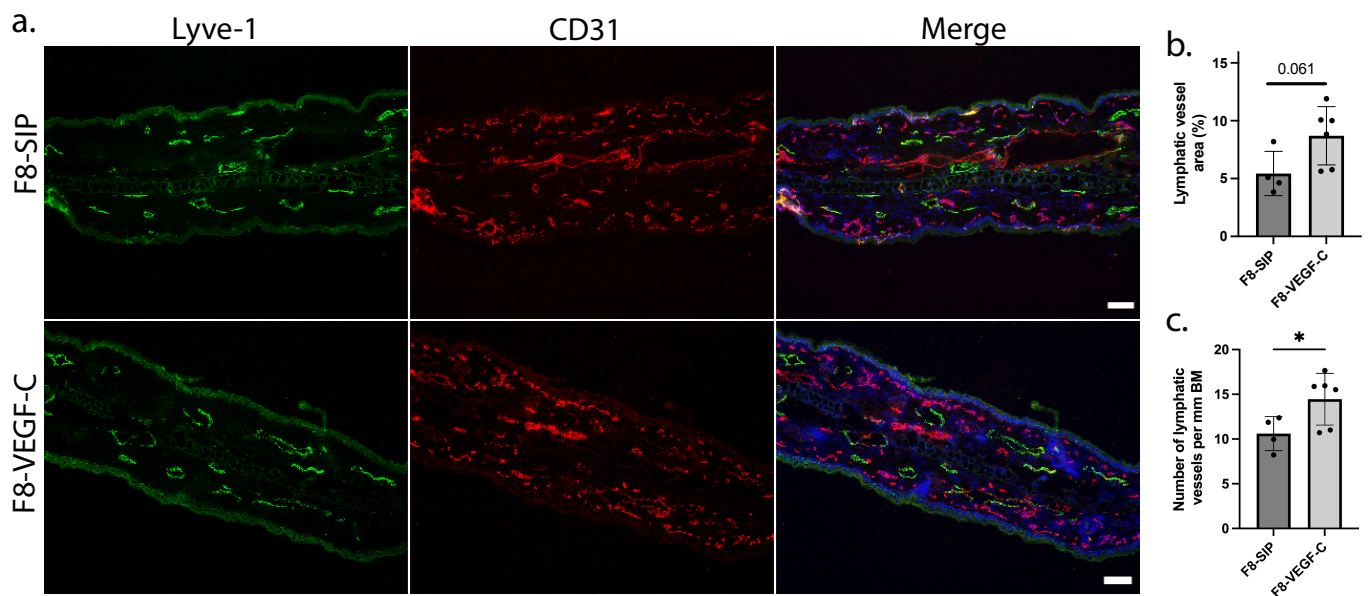

Supplementary Figure S1. (a) Representative immunofluorescence images of ears from F8-SIP and F8-VEGF-C treated mice stained for the lymphatic marker Lyve1 (green), the vessel marker CD31 (red) and Hoechst 33342 (blue) on day 179 post-challenge. Size bars: 100 $\mu$ m (b) Quantification of lymphatic vessel area in percentage of the analyzed region of interest in F8-SIP and F8-VEGF-C treated mice on day 179 post-challenge (expressed as mean percentage, n=5 mice per group, 2 tailed student's t-test). (c) Analysis of the number of lymphatic vessels in F8-SIP and F8-VEGF-C treated mice in the region of interest on day 179 post-challenge (expressed as mean number per mm basement membrane length, n=5 mice per group, 2 tailed student's t-test). All data are presented as mean  $\pm$  SD. \*P < 0.05
